# Supplementary material
Source: publisher figshare collection journal article supplement (https://gsajournals.figshare.com/ndownloader/files/24540998)
Supplement: Supplementary file 1 [file 24540998]

**Supplemental Table 3: Neurospora genes uncovered in the *dim* mutant hunt, other Neurospora genes affecting DNA methylation, and homologous proteins in model organisms.**

| Genes in *Neurospora crassa* that influence cytosine methylation | *Neurospora crassa* Gene ID: www.fungidb.org *(protein ID – NCBI)* | Homologous protein (model organism) | Homolog ID from model organism (source) |
| --- | --- | --- | --- |
| *dim-1* (chromatin remodeler) | NCU06484 (XP_957124.1) | Abo1 | SPAC31G5.19 (www.pombase.org) |
| *dim-2* (cytosine methyltransferase) | NCU02247 (XP_959891.1) | DMT1/MET1  (*A. thaliana*)  DNMT1  (*H. sapiens*) | At5g49160  (www.arabidopsis.org)  NP_001370  (www.ncbi.nlm.nih.gov) |
| *dim-3* (Importin α or nucleoporin-6 [NUP-6]) | NCU01249 (XP_009848027.1) | Imp1 (*S. pombe*) | SPBC1604.08c  (www.pombase.org) |
| *dim-5* (histone methyltransferase) | NCU04402 (XP_957479.2) | Clr4 (*S. pombe*) | SPBC428.08c  (www.pombase.org) |
| *dim-7* (DCDC member) | NCU04152 (XP_961308.2) | Dos2/Raf2  (*S. pombe*) | SPCC970.07c  (www.pombase.org) |
| *dim-8 (ddb1,* DCDC member*)* | NCU06605 (XP_962347.1) | Rik1 (*S. pombe*) | SPCC11E10.08  (www.pombase.org) |
| *dim-9* (DCDC member, DCAF) | NCU01656 (XP_956278.3) | Dos1/Raf1  (*S. pombe*) | SPCC613.12c  (www.pombase.org) |
| *cul4* (DCDC member) | | NCU00272 (XP_957743.3) |  | | --- | --- | | Cul4 (*S. pombe*) | SPAC3A11.08  (www.pombase.org) |
| *dim-10* | NCU04423 (XP_957500.2) | Clr5 (*S. pombe*) | SPAC29B12.08  (www.pombase.org) |
| *heterochromatin protein-1 (hpo)* | NCU04017 (XP_957632.1) | Swi6 (*S. pombe*) | SPAC664.01c  (www.pombase.org) |
| *histone H3* | NCU01635 (WP_069696828.1) | Hht1; Histone H3 (*S. pombe*) | SPAC1834.04  (www.pombase.org) |
| *hda-1* (HCHC member) | NCU01525 (XP_956974.3) | Clr3 *(S. pombe)* | SPBC800.03  (www.pombase.org) |
| *cdp-2* (HCHC member) | NCU00738 (XP_011392823.1) | n/a | *only found in closely related fungi* |
| *chap* (HCHC member) | NCU01796 (XP_956474.1) | n/a | *only found in closely related fungi* |
| *ppp-1* (protein phosphatase-1) | NCU00043 (XP_009850830.1) | Dis2 (*S. pombe*) | SPBC776.02c  (www.pombase.org) |
| *dmm-1* (DNA methylation modulator-1) | NCU01554 (XP_956257.1) | n/a | *only found in closely related fungi* |
| *dmm-2* (DNA methylation modulator-2) | NCU08289 (XP_011394296.1) | n/a | *only found in closely related fungi* |
